# Supplementary material for: Osteoclasts and their circulating precursors in rheumatoid arthritis: Relationships with disease activity and bone erosions
Source: PubMed Central journal article supplement — Bone Rep. 2020 May 15;12:100282. doi: 10.1016/j.bonr.2020.100282 (PMC7251539; doi:10.1016/j.bonr.2020.100282), 2020-05-15
Supplement: mmc2.pdf [file mmc2.pdf]

## Supplemental Table S2 Correlation at baseline between osteoclast parameters, demographics, RA characteristics and bone phenotype

Osteoclastic parameters included the number of osteoclast precursors (PBMC-CD14+ cells), and characteristics of PBMC-derived osteoclasts (osteoclast generated in vitro, osteoclast apoptosis and bone resorption). Correlations with these osteoclastic parameters and demographics or RA activity (DAS28 for tender or swollen joints, HAQ), as well as RA phenotype (seropositivity, erosions), and bone parameters (serum 25-OH vitamin D, lumbar or femoral T-score or BMD)

|                           | PBMC- CD14+ cells |        |       | Osteoclasts/well |        |       | in vitro bone resorption |        |       | Osteoclast apoptosis |        |       |
|---------------------------|-------------------|--------|-------|------------------|--------|-------|--------------------------|--------|-------|----------------------|--------|-------|
|                           | n                 | r      | p     | n                | r      | p     | n                        | r      | p     | n                    | r      | p     |
| Age                       | 139               | 0.06   | 0.481 | 140              | 0.000  | 0.999 | 139                      | 0.134  | 0.115 | 100                  | 0.063  | 0.534 |
| BMI                       | 139               | 0.085  | 0.317 | 140              | 0.067  | 0.429 | 139                      | 0.204  | 0.016 | 100                  | 0.093  | 0.358 |
| Physical activity (hrs)   | 84                | 0.063  | 0.571 | 84               | -0.086 | 0.436 | 84                       | -0.18  | 0.101 | 73                   | -0.169 | 0.152 |
| <b>Disease Activity</b>   |                   |        |       |                  |        |       |                          |        |       |                      |        |       |
| DAS28 Swollen             | 139               | -0.098 | 0.251 | 140              | -0.165 | 0.051 | 139                      | 0.019  | 0.827 | 100                  | -0.079 | 0.435 |
| DAS28 Tender              | 139               | -0.124 | 0.146 | 140              | -0.18  | 0.033 | 139                      | 0.054  | 0.53  | 100                  | -0.107 | 0.288 |
| Index DAS28               | 138               | -0.191 | 0.025 | 139              | -0.202 | 0.017 | 138                      | 0.028  | 0.741 | 99                   | -0.059 | 0.56  |
| Disease activity (yes/no) | 138               | -0.149 | 0.08  | 139              | -0.264 | 0.002 | 138                      | -0.033 | 0.702 | 99                   | -0.065 | 0.526 |
| HAQ                       | 139               | -0.206 | 0.015 | 140              | -0.073 | 0.394 | 139                      | -0.126 | 0.138 | 100                  | 0.029  | 0.773 |
| CRP                       | 139               | -0.113 | 0.185 | 140              | -0.01  | 0.906 | 139                      | 0.056  | 0.516 | 100                  | -0.055 | 0.587 |
| <b>RA phenotype</b>       |                   |        |       |                  |        |       |                          |        |       |                      |        |       |
| RF                        | 139               | 0.094  | 0.273 | 140              | -0.047 | 0.585 | 139                      | 0.075  | 0.382 | 100                  | -0.034 | 0.74  |
| Anti-CCP                  | 106               | 0.048  | 0.628 | 106              | -0.099 | 0.312 | 105                      | -0.113 | 0.251 | 82                   | -0.086 | 0.441 |
| RF+ or anti-CCP+          | 126               | 0.147  | 0.100 | 127              | -0.124 | 0.165 | 126                      | -0.152 | 0.090 | 92                   | -0.045 | 0.672 |
| Erosion SHS mean          | 139               | -0.073 | 0.395 | 140              | -0.15  | 0.077 | 139                      | -0.136 | 0.11  | 100                  | -0.133 | 0.186 |
| Erosion SHS mean/yrs      | 136               | -0.078 | 0.369 | 137              | -0.16  | 0.062 | 136                      | -0.03  | 0.73  | 97                   | -0.144 | 0.16  |
| <b>Bone phenotype</b>     |                   |        |       |                  |        |       |                          |        |       |                      |        |       |
| 25OHD                     | 131               | 0.092  | 0.296 | 131              | -0.031 | 0.721 | 131                      | -0.191 | 0.028 | 95                   | 0.059  | 0.572 |
| Lumbar BMD                | 129               | 0.049  | 0.578 | 130              | -0.049 | 0.582 | 129                      | 0.288  | 0.001 | 92                   | -0.034 | 0.749 |
| Lumbar ScoreT             | 132               | 0.004  | 0.963 | 133              | -0.01  | 0.912 | 132                      | 0.201  | 0.021 | 94                   | -0.007 | 0.946 |
| Femoral BMD               | 127               | 0.051  | 0.567 | 128              | 0.035  | 0.697 | 127                      | 0.127  | 0.155 | 91                   | -0.041 | 0.697 |
| Femoral ScoreT            | 130               | 0.011  | 0.903 | 131              | 0.095  | 0.278 | 130                      | 0.009  | 0.916 | 93                   | -0.063 | 0.546 |

Erosion SHS

Erosion score from the Sharp/van der Heijde modified method (SHS)

Total SHS

Total score from the Sharp/van der Heijde modified method (SHS)

Osteoclasts/well: number of multinucleated TRAP positive cells formed in cultures of PBMC-derived precursors

 p<0.05  
 Trends
