# Supplementary material for: Osteoclasts and their circulating precursors in rheumatoid arthritis: Relationships with disease activity and bone erosions
Source: PubMed Central journal article supplement — Bone Rep. 2020 May 15;12:100282. doi: 10.1016/j.bonr.2020.100282 (PMC7251539; doi:10.1016/j.bonr.2020.100282), 2020-05-15
Supplement: mmc6.pdf [file mmc6.pdf]

**Supplemental Table S6 : Patient demographics and baseline disease characteristics (EUPA cohort)**

|                      | <b>Baseline</b> |                  |
|----------------------|-----------------|------------------|
|                      | n               | n (%)            |
| Age $\geq$ 65 years  | 163             | 83 (50.92)       |
| Anti-CCP positive    | 163             | 50 (30.7)        |
| RF positive          | 163             | 55 (33.7)        |
| Anti-Sa positive     | 159             | 28 (17.6)        |
| CRP > 8              | 163             | 86 (52.8)        |
| HAQ $\geq$ 1         | 142             | 62 (43.66)       |
| DAS28, median (IQR)  | 148             | 5.2 (4.3-6.2)    |
| SDAI, median (IQR)   | 147             | 28.0 (19.5-41.9) |
| CDAI, median (IQR)   | 147             | 26.8 (17.9-39.8) |
| Total SHS $\geq$ 5   | 140             | 55 (39.3)        |
| Erosion SHS $\geq$ 5 | 140             | 17 (12.1)        |
| Osteoclasts > 248    | 163             | 73 (44.79)       |

*CDAI : Clinical Disease Activity Index*

*SDAI : Simplified Disease Activity Index*

*IQR : Interquartile range (25<sup>th</sup> - 75<sup>th</sup> percentiles)*

*Erosion SHS: Erosion score from the Sharp/van der Heijde modified method*

*Total SHS: Total score from the Sharp/van der Heijde modified method*
