# Supplementary material for: Osteoclasts and their circulating precursors in rheumatoid arthritis: Relationships with disease activity and bone erosions
Source: PubMed Central journal article supplement — Bone Rep. 2020 May 15;12:100282. doi: 10.1016/j.bonr.2020.100282 (PMC7251539; doi:10.1016/j.bonr.2020.100282), 2020-05-15
Supplement: mmc7.pdf [file mmc7.pdf]

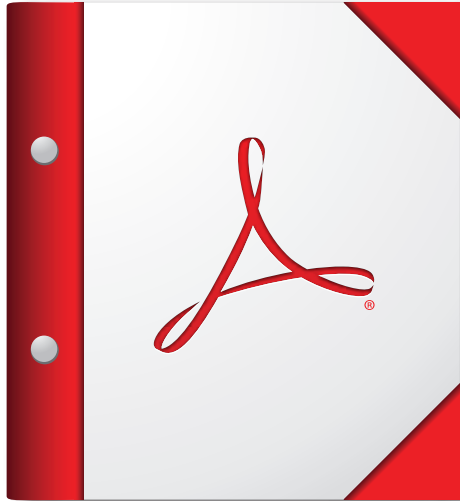

**For the best experience, open this PDF portfolio in  
Acrobat X or Adobe Reader X, or later.**

[Get Adobe Reader Now!](#)
